# Supplementary material for: Mindful Leader Development: How Leaders Experience the Effects of Mindfulness Training on Leader Capabilities
Source: PubMed Central journal article supplement (PMC6529524; doi:10.3389/fpsyg.2019.01081), 2019-05-15
Supplement: Table_1.pdf [file Table_1.pdf]

## *Supplementary Material*

**Supplementary Table 1. Overview of modules of the Workplace Mindfulness Training**

| <b>Module</b>                                   | <b>Goals</b>                                                                                                   | <b>Methods</b>                                                                                                                   |
|-------------------------------------------------|----------------------------------------------------------------------------------------------------------------|----------------------------------------------------------------------------------------------------------------------------------|
| <b>Deepening day</b>                            | Getting to know Mindfulness                                                                                    | Mindfulness meditation<br>Walking meditation<br>Simple dialogs<br>Reflection and journaling                                      |
| <b>Module 1: Attention and focus</b>            | Understand and experience how multi-tasking negatively impacts attention and wellbeing.                        | Multi-tasking exercises<br>Pausing Meditation to cope with interruptions<br>Mindful e-Mailing                                    |
| <b>Module 2: Emotions</b>                       | Understanding the neuroscience of emotions. Becoming curious about emotions and developing self-compassion.    | Mindfulness practice<br>Dialogs on emotions<br>Body scan<br>Method of working with emotions                                      |
| <b>Module 3: Happiness</b>                      | Learning how to cultivate happiness and how it impacts engagement and performance                              | Aimless wandering<br>Appreciative reflection                                                                                     |
| <b>Module 4: Time</b>                           | Understanding that we cannot manage time – but we can manage our attention. Learning about Flow.               | Time sensation exercise<br>Reflection on time perception<br>One minute pause<br>Flow discussion                                  |
| <b>Module 5: Review and transitions</b>         | Deepening previous learning and strengthening practice through more practice                                   | Mindfulness meditation<br>Rituals<br>Potentially Body Scan (20 min)                                                              |
| <b>Module 6: Communication</b>                  | Extending mindfulness in dealing with others.                                                                  | Mindful listening<br>Unmindful listening<br>Deepening in mindful dialogs                                                         |
| <b>Module 7: Collaboration and trust</b>        | Recognising that human relationships underpin all collaboration                                                | Mindful dialogues<br>Perspective change/appreciative reflection<br>Mindful feedback<br>Mindful meetings<br>Compassion meditation |
| <b>Module 8: Self management and leadership</b> | Understanding the role mindfulness plays in leading our own life and in cultivating authenticity in leadership | Mindful walking<br>Space-awareness exercises<br>Reflection on decision making<br>Leadership exercise                             |
| <b>Final Day</b>                                | Reflecting the journey and commitment.                                                                         | Walking through the module stations<br>Open Space – gathering of topics<br>World Café – Dialogue<br>Final presentation of topics |
